# Supplementary material
Source: PubMed Central journal article supplement (PMC4212832)
Supplement: NIHMS616063-supplement-2.pdf [file NIHMS616063-supplement-2.pdf]

**Supplementary Table 1.** Characteristics of ESCC cases and controls used in the study\*

| Study/phase         | Controls |                  |               | Cases |                  |               |
|---------------------|----------|------------------|---------------|-------|------------------|---------------|
|                     | N        | Age, mean (s.d.) | Sex, male (%) | N     | Age, mean (s.d.) | Sex, male (%) |
| NCI scan            | 2701     | 57.03 (9.56)     | 64.20         | 2013  | 56.28 (8.74)     | 60.01         |
| Henan scan          | 1083     | 47.30 (14.91)    | 50.09         | 1375  | 59.04 (9.60)     | 57.83         |
| Beijing scan        | 2004     | 61.41 (8.51)     | 83.48         | 1958  | 59.79 (9.74)     | 79.93         |
| Henan replication   | 4972     | 49.47 (12.67)    | 51.59         | 4850  | 60.53 (9.00)     | 61.42         |
| Beijing replication | 5086     | 56.39 (14.17)    | 76.03         | 4804  | 60.24 (9.07)     | 76.64         |

\* Nine subjects from the NCI and Henan scans were the same individuals and they were used only once in the joint analysis

**Supplementary Table 2.** Summary of SNPs prior to imputation

| <b>GWAS scan</b>     | <b>NCI</b> | <b>Beijing</b> | <b>Henan</b> | <b>Combined</b> |
|----------------------|------------|----------------|--------------|-----------------|
| PreQC (1)            | 556,896    | 660,020        | 626,865      |                 |
| QC excludes          | 95,481     | 7,093          | 155,425      |                 |
| PostQC/PreImputation | 461,415    | 652,927        | 471,440      |                 |
| PostImputation (2)   | 40,497,507 | 40,499,458     | 40,497,507   |                 |
| Merging (3)          |            |                |              | 40,373,742      |
| QC excludes (4)      |            |                |              | 32,817,527      |
| Final number of SNPs |            |                |              | 7,556,215       |

Notes:

- (1) Overlap in the number of SNPs among all three GWAS scans after QC is 130,787;
- (2) Overlap in the number of SNPs after imputation is 40,497,507;
- (3) Incompatible SNPs among sets were automatically excluded;
- (4) Excluded SNPs with INFO < 0.3 or MAF < 0.01 in study control population

Supplementary Table 3. Replication data testing for 14 SNPs that passed Stage 1

| SNP        | CHR   | LOC       | GROUP                                         | CATEGORY* | INFO  | NUM_CONTROL | NUM_CASE | REFERENCE_ALLELE | EFFECT_ALLELE | EFFECT_ALLELE_FREQ_CONTROL | EFFECT_ALLELE_FREQ_CASE | OR   | CI          | P        | P heterog. |
|------------|-------|-----------|-----------------------------------------------|-----------|-------|-------------|----------|------------------|---------------|----------------------------|-------------------------|------|-------------|----------|------------|
| rs7447927  | chr5  | 138861146 | 3 scan analysis (Stage 1)                     | i,i       | 0.957 | 5786        | 5336     | C                | G             | 0.460                      | 0.451                   | 0.87 | (0.82-0.92) | 4.07E-06 |            |
| rs7447927  | chr5  | 138861146 | Henan Replication                             | g         | 1.000 | 4802        | 4486     | C                | G             | 0.489                      | 0.438                   | 0.80 | (0.75-0.86) | 2.70E-11 |            |
| rs7447927  | chr5  | 138861146 | Beijing Replication                           | g         | 1.000 | 5079        | 4797     | C                | G             | 0.431                      | 0.397                   | 0.87 | (0.82-0.92) | 2.92E-06 |            |
| rs7447927  | chr5  | 138861146 | Combined                                      |           |       | 15667       | 14619    |                  |               |                            |                         | 0.85 | (0.82-0.88) | 7.72E-20 | 1.31E-01   |
| rs1642764  | chr17 | 7557834   | 3 scan analysis (Stage 1)                     | i,i       | 0.865 | 5786        | 5336     | C                | T             | 0.499                      | 0.456                   | 0.84 | (0.79-0.89) | 3.91E-08 |            |
| rs1642764  | chr17 | 7557834   | Henan Replication                             | g         | 1.000 | 4634        | 4694     | C                | T             | 0.484                      | 0.470                   | 0.93 | (0.87-0.99) | 2.67E-02 |            |
| rs1642764  | chr17 | 7557834   | Beijing Replication                           | g         | 1.000 | 5054        | 4777     | C                | T             | 0.520                      | 0.483                   | 0.86 | (0.81-0.92) | 1.55E-06 |            |
| rs1642764  | chr17 | 7557834   | Combined                                      |           |       | 15474       | 14807    |                  |               |                            |                         | 0.88 | (0.85-0.91) | 3.10E-13 | 7.70E-02   |
| rs35597309 | chr6  | 32589266  | 3 scan analysis (Stage 1)                     | i,i       | 0.921 | 5787        | 5336     | G                | A             | 0.072                      | 0.094                   | 1.32 | (1.18-1.47) | 6.17E-07 |            |
| rs35597309 | chr6  | 32589266  | Henan Replication                             | g         | 1.000 | 4659        | 4597     | G                | A             | 0.067                      | 0.085                   | 1.23 | (1.09-1.38) | 1.00E-03 |            |
| rs35597309 | chr6  | 32589266  | Beijing Replication                           | g         | 1.000 | 5079        | 4786     | G                | A             | 0.075                      | 0.080                   | 1.05 | (0.94-1.17) | 3.59E-01 |            |
| rs35597309 | chr6  | 32589266  | Combined                                      |           |       | 15525       | 14719    |                  |               |                            |                         | 1.19 | (1.12-1.27) | 1.18E-07 | 1.50E-02   |
| rs61271866 | chr9  | 21997015  | 3 scan analysis (Stage 1)                     | i,i       | 0.982 | 5786        | 5336     | T                | A             | 0.190                      | 0.225                   | 1.22 | (1.13-1.31) | 5.18E-08 |            |
| rs61271866 | chr9  | 21997015  | Henan Replication                             | g         | 1.000 | 4903        | 4810     | T                | A             | 0.201                      | 0.214                   | 1.09 | (1.01-1.18) | 2.36E-02 |            |
| rs61271866 | chr9  | 21997015  | Beijing Replication                           | g         | 1.000 | 5042        | 4746     | T                | A             | 0.201                      | 0.210                   | 1.03 | (0.96-1.11) | 4.50E-01 |            |
| rs61271866 | chr9  | 21997015  | Combined                                      |           |       | 15731       | 14892    |                  |               |                            |                         | 1.11 | (1.07-1.16) | 7.30E-07 | 4.36E-03   |
| rs7822239  | chr8  | 133119961 | 3 scan analysis (Stage 1)                     | i,i       | 0.986 | 5787        | 5336     | C                | A             | 0.270                      | 0.236                   | 0.86 | (0.81-0.92) | 1.14E-05 |            |
| rs7822239  | chr8  | 133119961 | Henan Replication                             | g         | 1.000 | 4577        | 4501     | C                | A             | 0.252                      | 0.244                   | 0.97 | (0.90-1.04) | 3.82E-01 |            |
| rs7822239  | chr8  | 133119961 | Beijing Replication                           | g         | 1.000 | 5044        | 4787     | C                | A             | 0.277                      | 0.264                   | 0.93 | (0.87-0.99) | 2.42E-02 |            |
| rs7822239  | chr8  | 133119961 | Combined                                      |           |       | 15408       | 14624    |                  |               |                            |                         | 0.91 | (0.88-0.95) | 8.48E-06 | 7.05E-02   |
| rs4252725  | chr1  | 204513256 | 3 scan analysis (Stage 1)                     | g,i       | 1.000 | 5787        | 5337     | A                | G             | 0.680                      | 0.653                   | 0.89 | (0.83-0.94) | 1.00E-04 |            |
| rs4252725  | chr1  | 204513256 | Henan Replication                             | g         | 1.000 | 4907        | 4817     | A                | G             | 0.670                      | 0.653                   | 0.92 | (0.86-0.98) | 1.44E-02 |            |
| rs4252725  | chr1  | 204513256 | Beijing Replication                           | g         | 1.000 | 5033        | 4764     | A                | G             | 0.673                      | 0.668                   | 0.97 | (0.91-1.03) | 2.86E-01 |            |
| rs4252725  | chr1  | 204513256 | Combined                                      |           |       | 15727       | 14918    |                  |               |                            |                         | 0.92 | (0.89-0.96) | 1.69E-05 | 1.52E-01   |
| rs9323746  | chr14 | 84920960  | 3 scan analysis (Stage 1)                     | g,g       | 1.000 | 5787        | 5337     | C                | T             | 0.351                      | 0.377                   | 1.15 | (1.09-1.22) | 3.59E-06 |            |
| rs9323746  | chr14 | 84920960  | Henan Replication                             | g         | 1.000 | 4896        | 4800     | C                | T             | 0.365                      | 0.376                   | 1.07 | (1.00-1.14) | 5.85E-02 |            |
| rs9323746  | chr14 | 84920960  | Beijing Replication                           | g         | 1.000 | 5078        | 4788     | C                | T             | 0.372                      | 0.369                   | 1.01 | (0.95-1.08) | 7.04E-01 |            |
| rs9323746  | chr14 | 84920960  | Combined                                      |           |       | 15761       | 14925    |                  |               |                            |                         | 1.08 | (1.04-1.12) | 5.65E-05 | 1.16E-02   |
| rs7038507  | chr9  | 122784665 | 3 scan analysis (Stage 1)                     | i,i       | 0.989 | 5787        | 5336     | G                | A             | 0.067                      | 0.082                   | 1.30 | (1.16-1.45) | 4.30E-06 |            |
| rs7038507  | chr9  | 122784665 | Beijing Replication                           | g         | 1.000 | 5083        | 4795     | G                | A             | 0.076                      | 0.077                   | 1.08 | (0.96-1.20) | 1.89E-01 |            |
| rs7038507  | chr9  | 122784665 | 3 scan analysis (Stage 1)+Beijing Replication |           |       | 10870       | 10131    |                  |               |                            |                         | 1.18 | (1.09-1.28) | 2.88E-05 | 2.04E-02   |
| rs1958578  | chr14 | 34800823  | 3 scan analysis (Stage 1)                     | g,g       | 0.971 | 5787        | 5336     | G                | A             | 0.843                      | 0.815                   | 0.83 | (0.77-0.90) | 2.52E-06 |            |
| rs1958578  | chr14 | 34800823  | Henan Replication                             | g         | 1.000 | 4914        | 4821     | G                | A             | 0.830                      | 0.827                   | 0.99 | (0.91-1.07) | 7.49E-01 |            |
| rs1958578  | chr14 | 34800823  | Beijing Replication                           | g         | 1.000 | 5067        | 4759     | G                | A             | 0.850                      | 0.841                   | 0.95 | (0.87-1.03) | 1.87E-01 |            |
| rs1958578  | chr14 | 34800823  | Combined                                      |           |       | 15768       | 14916    |                  |               |                            |                         | 0.91 | (0.87-0.96) | 1.65E-04 | 7.54E-03   |
| rs27209    | chr5  | 57625982  | 3 scan analysis (Stage 1)                     | i,i       | 0.979 | 5786        | 5336     | G                | A             | 0.440                      | 0.470                   | 1.15 | (1.08-1.22) | 4.33E-06 |            |
| rs27209    | chr5  | 57623118  | Beijing Replication                           | g         | 1.000 | 5082        | 4788     | G                | A             | 0.460                      | 0.456                   | 0.98 | (0.92-1.04) | 5.63E-01 |            |
| rs27209    | chr5  | 57623118  | 3 scan analysis (Stage 1)+Beijing Replication |           |       | 10868       | 10124    |                  |               |                            |                         | 1.06 | (1.02-1.11) | 3.70E-03 | 3.01E-04   |
| rs7999802  | chr13 | 68134441  | 3 scan analysis (Stage 1)                     | g,i       | 0.995 | 5786        | 5337     | T                | C             | 0.872                      | 0.893                   | 1.26 | (1.15-1.38) | 6.12E-07 |            |
| rs7999802  | chr13 | 68134441  | Henan Replication                             | g         | 1.000 | 4814        | 4718     | T                | C             | 0.894                      | 0.893                   | 0.97 | (0.87-1.07) | 5.32E-01 |            |
| rs7999802  | chr13 | 68134441  | Beijing Replication                           | g         | 1.000 | 5063        | 4750     | T                | C             | 0.877                      | 0.876                   | 0.98 | (0.89-1.07) | 6.50E-01 |            |
| rs7999802  | chr13 | 68134441  | Combined                                      |           |       | 15663       | 14805    |                  |               |                            |                         | 1.07 | (1.01-1.13) | 1.64E-02 | 5.15E-05   |
| rs75791390 | chr5  | 71457813  | 3 scan analysis (Stage 1)                     | i,i       | 0.929 | 5786        | 5336     | A                | G             | 0.613                      | 0.651                   | 1.15 | (1.09-1.23) | 3.79E-06 |            |
| rs75791390 | chr5  | 71457813  | Henan Replication                             | g         | 1.000 | 4875        | 4787     | A                | G             | 0.649                      | 0.649                   | 1.00 | (0.93-1.07) | 9.65E-01 |            |
| rs75791390 | chr5  | 71452094  | Beijing Replication                           | g         | 1.000 | 5081        | 4790     | A                | G             | 0.374                      | 0.373                   | 0.98 | (0.92-1.04) | 4.19E-01 |            |
| rs75791390 | chr5  | 71452094  | Combined                                      |           |       | 15742       | 14913    |                  |               |                            |                         | 1.04 | (1.01-1.08) | 2.48E-02 | 2.02E-04   |
| rs1917435  | chr8  | 46923031  | 3 scan analysis (Stage 1)                     | i,i       | 0.991 | 5786        | 5336     | C                | T             | 0.687                      | 0.674                   | 0.88 | (0.83-0.93) | 2.92E-05 |            |
| rs1917435  | chr8  | 46923031  | Henan Replication                             | g         | 1.000 | 4907        | 4809     | C                | T             | 0.679                      | 0.681                   | 1.05 | (0.98-1.12) | 1.56E-01 |            |
| rs1917435  | chr8  | 46923031  | Beijing Replication                           | g         | 1.000 | 5069        | 4758     | C                | T             | 0.670                      | 0.669                   | 0.99 | (0.93-1.05) | 7.18E-01 |            |
| rs1917435  | chr8  | 46923031  | Combined                                      |           |       | 15762       | 14903    |                  |               |                            |                         | 0.96 | (0.93-1.00) | 5.12E-02 | 3.70E-04   |
| rs10935355 | chr3  | 139543726 | 3 scan analysis (Stage 1)                     | g,i       | 0.980 | 5786        | 5336     | A                | T             | 0.230                      | 0.202                   | 0.85 | (0.79-0.91) | 5.42E-06 |            |
| rs10935355 | chr3  | 139543726 | Henan Replication                             | g         | 1.000 | 4902        | 4809     | A                | T             | 0.220                      | 0.222                   | 1.00 | (0.93-1.08) | 9.32E-01 |            |
| rs10935355 | chr3  | 139543726 | Beijing Replication                           | g         | 1.000 | 5080        | 4792     | A                | T             | 0.223                      | 0.227                   | 1.05 | (0.98-1.13) | 1.80E-01 |            |
| rs10935355 | chr3  | 139543726 | Combined                                      |           |       | 15768       | 14937    |                  |               |                            |                         | 0.96 | (0.92-1.00) | 6.57E-02 | 7.24E-05   |

\*Categories in Stage 1 are listed in the order Beijing, Henan, and NCI, where 'g' indicates that the SNP was genotyped on the array and 'i' indicates that the SNP was imputed

Supplementary Table 4. Individual GWAS analysis results and meta-analysis

| SNP        | CHR   | LOC       | GROUP             | CATEGORY* | INFO  | NUM_CONTROL | NUM_CASE | REFERENCE_ALLELE | EFFECT_ALLELE | EFFECT_ALLELE<br>FREQ_CONTROL | EFFECT_ALLELE<br>FREQ_CASE | OR   | CI          | P        | P heterog. |
|------------|-------|-----------|-------------------|-----------|-------|-------------|----------|------------------|---------------|-------------------------------|----------------------------|------|-------------|----------|------------|
| rs7447927  | chr5  | 138861146 | nci               | i         | 0.962 | 2707        | 2021     | C                | G             | 0.472                         | 0.458                      | 0.9  | (0.83-0.98) | 1.60E-02 |            |
| rs7447927  | chr5  | 138861146 | beijing           | i         | 0.948 | 2003        | 1957     | C                | G             | 0.424                         | 0.441                      | 0.9  | (0.81-1.01) | 7.06E-02 |            |
| rs7447927  | chr5  | 138861146 | henan             | i         | 0.962 | 1082        | 1374     | C                | G             | 0.500                         | 0.454                      | 0.77 | (0.68-0.88) | 7.64E-05 |            |
| rs7447927  | chr5  | 138861146 | beijing+henan+nci |           |       | 5792        | 5352     |                  |               |                               |                            | 0.87 | (0.82-0.92) | 6.23E-06 | 1.16E-01   |
| rs1642764  | chr17 | 7557834   | nci               | i         | 0.899 | 2707        | 2021     | C                | T             | 0.488                         | 0.444                      | 0.84 | (0.77-0.92) | 1.21E-04 |            |
| rs1642764  | chr17 | 7557834   | beijing           | i         | 0.806 | 2003        | 1957     | C                | T             | 0.514                         | 0.468                      | 0.88 | (0.78-0.99) | 3.12E-02 |            |
| rs1642764  | chr17 | 7557834   | henan             | i         | 0.893 | 1082        | 1374     | C                | T             | 0.498                         | 0.457                      | 0.84 | (0.74-0.96) | 1.19E-02 |            |
| rs1642764  | chr17 | 7557834   | beijing+henan+nci |           |       | 5792        | 5352     |                  |               |                               |                            | 0.85 | (0.80-0.91) | 4.74E-07 | 8.33E-01   |
| rs35597309 | chr6  | 32589266  | nci               | i         | 0.910 | 2707        | 2022     | G                | A             | 0.077                         | 0.109                      | 1.43 | (1.23-1.67) | 4.27E-06 |            |
| rs35597309 | chr6  | 32589266  | beijing           | i         | 0.933 | 2003        | 1957     | G                | A             | 0.069                         | 0.079                      | 1.02 | (0.82-1.25) | 8.83E-01 |            |
| rs35597309 | chr6  | 32589266  | henan             | i         | 0.927 | 1082        | 1374     | G                | A             | 0.063                         | 0.093                      | 1.55 | (1.22-1.97) | 3.50E-04 |            |
| rs35597309 | chr6  | 32589266  | beijing+henan+nci |           |       | 5792        | 5353     |                  |               |                               |                            | 1.32 | (1.19-1.48) | 5.62E-07 | 1.18E-02   |
| rs61271866 | chr9  | 21997015  | nci               | i         | 0.988 | 2707        | 2021     | T                | A             | 0.182                         | 0.231                      | 1.34 | (1.20-1.48) | 7.72E-08 |            |
| rs61271866 | chr9  | 21997015  | beijing           | i         | 0.971 | 2003        | 1957     | T                | A             | 0.192                         | 0.225                      | 1.17 | (1.03-1.34) | 1.82E-02 |            |
| rs61271866 | chr9  | 21997015  | henan             | i         | 0.990 | 1082        | 1374     | T                | A             | 0.208                         | 0.218                      | 1.03 | (0.88-1.21) | 6.82E-01 |            |
| rs61271866 | chr9  | 21997015  | beijing+henan+nci |           |       | 5792        | 5352     |                  |               |                               |                            | 1.21 | (1.13-1.30) | 1.99E-07 | 2.28E-02   |
| rs7822239  | chr8  | 133119961 | nci               | i         | 0.986 | 2707        | 2022     | C                | A             | 0.265                         | 0.222                      | 0.82 | (0.74-0.91) | 1.11E-04 |            |
| rs7822239  | chr8  | 133119961 | beijing           | i         | 0.986 | 2003        | 1957     | C                | A             | 0.286                         | 0.250                      | 0.85 | (0.76-0.96) | 9.60E-03 |            |
| rs7822239  | chr8  | 133119961 | henan             | i         | 0.985 | 1082        | 1375     | C                | A             | 0.252                         | 0.237                      | 0.93 | (0.80-1.08) | 3.46E-01 |            |
| rs7822239  | chr8  | 133119961 | beijing+henan+nci |           |       | 5792        | 5354     |                  |               |                               |                            | 0.85 | (0.80-0.91) | 5.41E-06 | 3.93E-01   |
| rs4252725  | chr1  | 204513256 | nci               | i         | 1.000 | 2708        | 2022     | A                | G             | 0.671                         | 0.651                      | 0.92 | (0.84-1.01) | 6.49E-02 |            |
| rs4252725  | chr1  | 204513256 | beijing           | g         | 1.000 | 2004        | 1958     | A                | G             | 0.680                         | 0.655                      | 0.89 | (0.79-0.99) | 3.74E-02 |            |
| rs4252725  | chr1  | 204513256 | henan             | i         | 0.999 | 1083        | 1375     | A                | G             | 0.702                         | 0.654                      | 0.8  | (0.70-0.92) | 1.17E-03 |            |
| rs4252725  | chr1  | 204513256 | beijing+henan+nci |           |       | 5795        | 5355     |                  |               |                               |                            | 0.88 | (0.83-0.94) | 8.38E-05 | 2.44E-01   |
| rs9323746  | chr14 | 84920960  | nci               | g         | 1.000 | 2708        | 2022     | C                | T             | 0.352                         | 0.369                      | 1.11 | (1.01-1.21) | 2.74E-02 |            |
| rs9323746  | chr14 | 84920960  | beijing           | g         | 1.000 | 2004        | 1958     | C                | T             | 0.351                         | 0.374                      | 1.16 | (1.04-1.30) | 6.64E-03 |            |
| rs9323746  | chr14 | 84920960  | henan             | g         | 1.000 | 1083        | 1375     | C                | T             | 0.350                         | 0.392                      | 1.26 | (1.10-1.44) | 7.08E-04 |            |
| rs9323746  | chr14 | 84920960  | beijing+henan+nci |           |       | 5795        | 5355     |                  |               |                               |                            | 1.15 | (1.09-1.23) | 4.33E-06 | 2.77E-01   |
| rs7038507  | chr9  | 122784665 | nci               | i         | 0.988 | 2707        | 2022     | G                | A             | 0.072                         | 0.086                      | 1.31 | (1.12-1.54) | 9.48E-04 |            |
| rs7038507  | chr9  | 122784665 | beijing           | i         | 0.991 | 2003        | 1957     | G                | A             | 0.061                         | 0.078                      | 1.3  | (1.06-1.59) | 1.35E-02 |            |
| rs7038507  | chr9  | 122784665 | henan             | i         | 0.987 | 1082        | 1374     | G                | A             | 0.064                         | 0.081                      | 1.08 | (0.85-1.38) | 5.09E-01 |            |
| rs7038507  | chr9  | 122784665 | beijing+henan+nci |           |       | 5792        | 5353     |                  |               |                               |                            | 1.26 | (1.12-1.40) | 7.54E-05 | 4.07E-01   |
| rs1958578  | chr14 | 34800823  | nci               | g         | 1.000 | 2708        | 2022     | G                | A             | 0.840                         | 0.819                      | 0.87 | (0.77-0.97) | 1.36E-02 |            |
| rs1958578  | chr14 | 34800823  | beijing           | i         | 0.918 | 2004        | 1957     | G                | A             | 0.848                         | 0.810                      | 0.79 | (0.68-0.91) | 1.50E-03 |            |
| rs1958578  | chr14 | 34800823  | henan             | g         | 1.000 | 1083        | 1375     | G                | A             | 0.844                         | 0.815                      | 0.83 | (0.71-0.98) | 2.99E-02 |            |
| rs1958578  | chr14 | 34800823  | beijing+henan+nci |           |       | 5795        | 5354     |                  |               |                               |                            | 0.84 | (0.77-0.90) | 8.29E-06 | 6.03E-01   |
| rs27209    | chr5  | 57625982  | nci               | i         | 0.985 | 2707        | 2021     | G                | A             | 0.446                         | 0.468                      | 1.09 | (1.00-1.19) | 4.19E-02 |            |
| rs27209    | chr5  | 57625982  | beijing           | i         | 0.969 | 2003        | 1957     | G                | A             | 0.438                         | 0.462                      | 1.18 | (1.06-1.32) | 2.64E-03 |            |
| rs27209    | chr5  | 57625982  | henan             | i         | 0.986 | 1083        | 1374     | G                | A             | 0.430                         | 0.484                      | 1.25 | (1.10-1.42) | 5.51E-04 |            |
| rs27209    | chr5  | 57625982  | beijing+henan+nci |           |       | 5793        | 5352     |                  |               |                               |                            | 1.15 | (1.09-1.22) | 2.94E-06 | 1.96E-01   |
| rs7999802  | chr13 | 68134441  | nci               | i         | 0.992 | 2708        | 2022     | T                | C             | 0.873                         | 0.899                      | 1.3  | (1.13-1.48) | 1.44E-04 |            |
| rs7999802  | chr13 | 68134441  | beijing           | g         | 1.000 | 2004        | 1958     | T                | C             | 0.870                         | 0.889                      | 1.19 | (1.01-1.41) | 3.68E-02 |            |
| rs7999802  | chr13 | 68134441  | henan             | i         | 0.992 | 1082        | 1375     | T                | C             | 0.872                         | 0.889                      | 1.14 | (0.93-1.40) | 1.97E-01 |            |
| rs7999802  | chr13 | 68134441  | beijing+henan+nci |           |       | 5794        | 5355     |                  |               |                               |                            | 1.23 | (1.12-1.35) | 1.17E-05 | 5.31E-01   |
| rs75791390 | chr5  | 71457813  | nci               | i         | 0.952 | 2707        | 2021     | A                | G             | 0.602                         | 0.647                      | 1.19 | (1.09-1.30) | 1.62E-04 |            |
| rs75791390 | chr5  | 71457813  | beijing           | i         | 0.888 | 2003        | 1957     | A                | G             | 0.623                         | 0.663                      | 1.13 | (1.01-1.27) | 3.85E-02 |            |
| rs75791390 | chr5  | 71457813  | henan             | i         | 0.948 | 1082        | 1374     | A                | G             | 0.621                         | 0.640                      | 1.08 | (0.95-1.24) | 2.39E-01 |            |
| rs75791390 | chr5  | 71457813  | beijing+henan+nci |           |       | 5792        | 5352     |                  |               |                               |                            | 1.15 | (1.08-1.22) | 1.62E-05 | 5.15E-01   |
| rs1917435  | chr8  | 46923031  | nci               | i         | 0.993 | 2707        | 2021     | C                | T             | 0.689                         | 0.681                      | 0.92 | (0.84-1.01) | 8.18E-02 |            |
| rs1917435  | chr8  | 46923031  | beijing           | i         | 0.989 | 2003        | 1957     | C                | T             | 0.679                         | 0.666                      | 0.86 | (0.77-0.96) | 8.64E-03 |            |
| rs1917435  | chr8  | 46923031  | henan             | i         | 0.990 | 1082        | 1374     | C                | T             | 0.698                         | 0.674                      | 0.83 | (0.73-0.95) | 8.50E-03 |            |
| rs1917435  | chr8  | 46923031  | beijing+henan+nci |           |       | 5792        | 5352     |                  |               |                               |                            | 0.88 | (0.83-0.94) | 1.06E-04 | 4.02E-01   |
| rs10935355 | chr3  | 139543726 | nci               | i         | 0.970 | 2708        | 2021     | A                | T             | 0.227                         | 0.199                      | 0.83 | (0.75-0.93) | 7.94E-04 |            |
| rs10935355 | chr3  | 139543726 | beijing           | g         | 1.000 | 2004        | 1958     | A                | T             | 0.235                         | 0.206                      | 0.87 | (0.76-0.98) | 2.77E-02 |            |
| rs10935355 | chr3  | 139543726 | henan             | i         | 0.967 | 1082        | 1374     | A                | T             | 0.227                         | 0.203                      | 0.84 | (0.72-0.98) | 2.86E-02 |            |
| rs10935355 | chr3  | 139543726 | beijing+henan+nci |           |       | 5794        | 5353     |                  |               |                               |                            | 0.85 | (0.79-0.91) | 5.47E-06 | 8.96E-01   |

\* 'g' indicates that the SNP was genotyped on the array and 'i' indicates that the SNP was imputed

**Supplementary Table 5.** Association results for top 4 SNPs stratified by study group and alcohol status

| Group   | SNP        | CHR   | LOC       | GROUP              | CATEGORY* | INFO  | NUM_CONTROL | NUM_CASE | REFERENCE_ALLELE | EFFECT_ALLELE | EFFECT_ALLELE<br>FREQ_CONTROL | EFFECT_ALLELE<br>FREQ_CASE | OR   | CI          | P        | P heterog. |
|---------|------------|-------|-----------|--------------------|-----------|-------|-------------|----------|------------------|---------------|-------------------------------|----------------------------|------|-------------|----------|------------|
| Beijing | rs7447927  | chr5  | 138861146 | nondrinker         | i         | 0.948 | 1113        | 864      | C                | G             | 0.413                         | 0.443                      | 0.95 | (0.81-1.11) | 4.92E-01 |            |
| Beijing | rs7447927  | chr5  | 138861146 | drinker            | i         | 0.948 | 889         | 1092     | C                | G             | 0.437                         | 0.439                      | 0.87 | (0.74-1.02) | 7.99E-02 |            |
| Beijing | rs7447927  | chr5  | 138861146 | drinker+nondrinker |           |       | 2002        | 1956     |                  |               |                               |                            | 0.91 | (0.81-1.01) | 8.56E-02 | 4.46E-01   |
| Henan   | rs7447927  | chr5  | 138861146 | nondrinker         | i         | 0.961 | 129         | 927      | C                | G             | 0.505                         | 0.442                      | 0.78 | (0.60-1.01) | 5.75E-02 |            |
| Henan   | rs7447927  | chr5  | 138861146 | drinker            | i         | 0.969 | 38          | 170      | C                | G             | 0.512                         | 0.479                      | 0.84 | (0.51-1.40) | 5.04E-01 |            |
| Henan   | rs7447927  | chr5  | 138861146 | drinker+nondrinker |           |       | 167         | 1097     |                  |               |                               |                            | 0.79 | (0.63-1.00) | 4.61E-02 | 7.88E-01   |
| NCI     | rs7447927  | chr5  | 138861146 | nondrinker         | i         | 0.962 | 1808        | 1622     | C                | G             | 0.490                         | 0.465                      | 0.91 | (0.83-1.00) | 5.33E-02 |            |
| NCI     | rs7447927  | chr5  | 138861146 | drinker            | i         | 0.96  | 295         | 303      | C                | G             | 0.478                         | 0.430                      | 0.81 | (0.64-1.03) | 7.95E-02 |            |
| NCI     | rs7447927  | chr5  | 138861146 | drinker+nondrinker |           |       | 2103        | 1925     |                  |               |                               |                            | 0.89 | (0.82-0.98) | 1.43E-02 | 3.69E-01   |
| Beijing | rs1642764  | chr17 | 7557834   | nondrinker         | i         | 0.806 | 1113        | 864      | C                | T             | 0.513                         | 0.460                      | 0.82 | (0.69-0.97) | 2.02E-02 |            |
| Beijing | rs1642764  | chr17 | 7557834   | drinker            | i         | 0.807 | 889         | 1092     | C                | T             | 0.515                         | 0.474                      | 0.93 | (0.79-1.11) | 4.41E-01 |            |
| Beijing | rs1642764  | chr17 | 7557834   | drinker+nondrinker |           |       | 2002        | 1956     |                  |               |                               |                            | 0.87 | (0.77-0.99) | 2.80E-02 | 2.81E-01   |
| Henan   | rs1642764  | chr17 | 7557834   | nondrinker         | i         | 0.888 | 129         | 927      | C                | T             | 0.529                         | 0.469                      | 0.76 | (0.58-1.00) | 5.31E-02 |            |
| Henan   | rs1642764  | chr17 | 7557834   | drinker            | i         | 0.890 | 38          | 170      | C                | T             | 0.510                         | 0.468                      | 0.84 | (0.50-1.41) | 5.10E-01 |            |
| Henan   | rs1642764  | chr17 | 7557834   | drinker+nondrinker |           |       | 167         | 1097     |                  |               |                               |                            | 0.78 | (0.61-0.99) | 4.38E-02 | 7.38E-01   |
| NCI     | rs1642764  | chr17 | 7557834   | nondrinker         | i         | 0.899 | 1808        | 1622     | C                | T             | 0.478                         | 0.443                      | 0.84 | (0.76-0.93) | 5.36E-04 |            |
| NCI     | rs1642764  | chr17 | 7557834   | drinker            | i         | 0.900 | 295         | 303      | C                | T             | 0.483                         | 0.444                      | 0.84 | (0.66-1.08) | 1.70E-01 |            |
| NCI     | rs1642764  | chr17 | 7557834   | drinker+nondrinker |           |       | 2103        | 1925     |                  |               |                               |                            | 0.84 | (0.76-0.92) | 1.97E-04 | 9.41E-01   |
| Beijing | rs35597309 | chr6  | 32589266  | nondrinker         | i         | 0.936 | 1113        | 864      | G                | A             | 0.067                         | 0.090                      | 1.08 | (0.81-1.43) | 6.05E-01 |            |
| Beijing | rs35597309 | chr6  | 32589266  | drinker            | i         | 0.930 | 889         | 1092     | G                | A             | 0.071                         | 0.071                      | 0.96 | (0.70-1.30) | 7.72E-01 |            |
| Beijing | rs35597309 | chr6  | 32589266  | drinker+nondrinker |           |       | 2002        | 1956     |                  |               |                               |                            | 1.02 | (0.83-1.26) | 8.53E-01 | 5.74E-01   |
| Henan   | rs35597309 | chr6  | 32589266  | nondrinker         | i         | 0.925 | 129         | 927      | G                | A             | 0.064                         | 0.102                      | 1.64 | (1.03-2.60) | 3.77E-02 |            |
| Henan   | rs35597309 | chr6  | 32589266  | drinker            | i         | 0.927 | 39          | 170      | G                | A             | 0.108                         | 0.085                      | 0.72 | (0.29-1.78) | 4.75E-01 |            |
| Henan   | rs35597309 | chr6  | 32589266  | drinker+nondrinker |           |       | 168         | 1097     |                  |               |                               |                            | 1.38 | (0.91-2.09) | 1.28E-01 | 1.13E-01   |
| NCI     | rs35597309 | chr6  | 32589266  | nondrinker         | i         | 0.906 | 1809        | 1622     | G                | A             | 0.079                         | 0.112                      | 1.54 | (1.29-1.83) | 1.04E-06 |            |
| NCI     | rs35597309 | chr6  | 32589266  | drinker            | i         | 0.921 | 295         | 303      | G                | A             | 0.106                         | 0.111                      | 1.05 | (0.72-1.54) | 7.89E-01 |            |
| NCI     | rs35597309 | chr6  | 32589266  | drinker+nondrinker |           |       | 2104        | 1925     |                  |               |                               |                            | 1.44 | (1.23-1.69) | 5.13E-06 | 7.74E-02   |
| Beijing | rs61271866 | chr9  | 21997015  | nondrinker         | i         | 0.970 | 1113        | 864      | T                | A             | 0.194                         | 0.230                      | 1.12 | (0.93-1.35) | 2.13E-01 |            |
| Beijing | rs61271866 | chr9  | 21997015  | drinker            | i         | 0.971 | 889         | 1092     | T                | A             | 0.189                         | 0.220                      | 1.22 | (1.01-1.48) | 4.23E-02 |            |
| Beijing | rs61271866 | chr9  | 21997015  | drinker+nondrinker |           |       | 2002        | 1956     |                  |               |                               |                            | 1.17 | (1.02-1.34) | 2.12E-02 | 5.47E-01   |
| Henan   | rs61271866 | chr9  | 21997015  | nondrinker         | i         | 0.990 | 129         | 927      | T                | A             | 0.215                         | 0.214                      | 1.00 | (0.72-1.38) | 9.98E-01 |            |
| Henan   | rs61271866 | chr9  | 21997015  | drinker            | i         | 0.995 | 38          | 170      | T                | A             | 0.255                         | 0.222                      | 0.75 | (0.41-1.38) | 3.52E-01 |            |
| Henan   | rs61271866 | chr9  | 21997015  | drinker+nondrinker |           |       | 167         | 1097     |                  |               |                               |                            | 0.94 | (0.70-1.25) | 6.59E-01 | 4.12E-01   |
| NCI     | rs61271866 | chr9  | 21997015  | nondrinker         | i         | 0.989 | 1809        | 1622     | T                | A             | 0.187                         | 0.230                      | 1.32 | (1.17-1.49) | 4.06E-06 |            |
| NCI     | rs61271866 | chr9  | 21997015  | drinker            | i         | 0.987 | 295         | 303      | T                | A             | 0.188                         | 0.242                      | 1.42 | (1.07-1.87) | 1.45E-02 |            |
| NCI     | rs61271866 | chr9  | 21997015  | drinker+nondrinker |           |       | 2104        | 1925     |                  |               |                               |                            | 1.34 | (1.20-1.49) | 2.04E-07 | 6.64E-01   |

\* 'g' indicates that the SNP was genotyped on the array and 'i' indicates that the SNP was imputed

**Supplementary Table 6.** Association results for top 4 SNPs stratified by study group and tobacco status

| Group   | SNP        | CHR   | LOC       | GROUP            | CATEGORY* | INFO  | NUM_CONTROL | NUM_CASE | REFERENCE_ALLELE | EFFECT_ALLELE | EFFECT_ALLELE | EFFECT_ALLELE | OR   | CI          | P        | P heterog. |
|---------|------------|-------|-----------|------------------|-----------|-------|-------------|----------|------------------|---------------|---------------|---------------|------|-------------|----------|------------|
|         |            |       |           |                  |           |       |             |          |                  |               |               |               |      |             |          |            |
| Beijing | rs7447927  | chr5  | 138861146 | nonsmoker        | i         | 0.95  | 877         | 679      | C                | G             | 0.412         | 0.442         | 0.98 | (0.82-1.16) | 7.79E-01 |            |
| Beijing | rs7447927  | chr5  | 138861146 | smoker           | i         | 0.95  | 1125        | 1277     | C                | G             | 0.433         | 0.440         | 0.86 | (0.74-0.99) | 4.09E-02 |            |
| Beijing | rs7447927  | chr5  | 138861146 | nonsmoker+smoker |           |       | 2002        | 1956     |                  |               |               |               | 0.91 | (0.81-1.01) | 8.22E-02 | 2.66E-01   |
| Henan   | rs7447927  | chr5  | 138861146 | nonsmoker        | i         | 0.96  | 135         | 809      | C                | G             | 0.508         | 0.441         | 0.76 | (0.59-0.98) | 3.24E-02 |            |
| Henan   | rs7447927  | chr5  | 138861146 | smoker           | i         | 0.96  | 32          | 288      | C                | G             | 0.501         | 0.468         | 0.91 | (0.54-1.53) | 7.22E-01 |            |
| Henan   | rs7447927  | chr5  | 138861146 | nonsmoker+smoker |           |       | 167         | 1097     |                  |               |               |               | 0.78 | (0.62-0.99) | 3.78E-02 | 5.33E-01   |
| NCI     | rs7447927  | chr5  | 138861146 | nonsmoker        | i         | 0.96  | 881         | 922      | C                | G             | 0.485         | 0.450         | 0.86 | (0.76-0.99) | 3.30E-02 |            |
| NCI     | rs7447927  | chr5  | 138861146 | smoker           | i         | 0.96  | 1222        | 1003     | C                | G             | 0.491         | 0.469         | 0.92 | (0.81-1.03) | 1.50E-01 |            |
| NCI     | rs7447927  | chr5  | 138861146 | nonsmoker+smoker |           |       | 2103        | 1925     |                  |               |               |               | 0.89 | (0.82-0.98) | 1.26E-02 | 5.32E-01   |
| Beijing | rs1642764  | chr17 | 7557834   | nonsmoker        | i         | 0.805 | 877         | 679      | C                | T             | 0.518         | 0.471         | 0.88 | (0.74-1.06) | 1.77E-01 |            |
| Beijing | rs1642764  | chr17 | 7557834   | smoker           | i         | 0.807 | 1125        | 1277     | C                | T             | 0.511         | 0.466         | 0.88 | (0.75-1.03) | 1.15E-01 |            |
| Beijing | rs1642764  | chr17 | 7557834   | nonsmoker+smoker |           |       | 2002        | 1956     |                  |               |               |               | 0.88 | (0.78-0.99) | 3.80E-02 | 9.70E-01   |
| Henan   | rs1642764  | chr17 | 7557834   | nonsmoker        | i         | 0.886 | 135         | 809      | C                | T             | 0.515         | 0.467         | 0.80 | (0.61-1.05) | 1.11E-01 |            |
| Henan   | rs1642764  | chr17 | 7557834   | smoker           | i         | 0.895 | 32          | 288      | C                | T             | 0.565         | 0.473         | 0.65 | (0.38-1.12) | 1.22E-01 |            |
| Henan   | rs1642764  | chr17 | 7557834   | nonsmoker+smoker |           |       | 167         | 1097     |                  |               |               |               | 0.77 | (0.60-0.98) | 3.37E-02 | 5.10E-01   |
| NCI     | rs1642764  | chr17 | 7557834   | nonsmoker        | i         | 0.896 | 881         | 922      | C                | T             | 0.499         | 0.450         | 0.80 | (0.69-0.91) | 1.13E-03 |            |
| NCI     | rs1642764  | chr17 | 7557834   | smoker           | i         | 0.901 | 1222        | 1003     | C                | T             | 0.464         | 0.436         | 0.89 | (0.78-1.01) | 7.44E-02 |            |
| NCI     | rs1642764  | chr17 | 7557834   | nonsmoker+smoker |           |       | 2103        | 1925     |                  |               |               |               | 0.85 | (0.77-0.93) | 4.29E-04 | 2.38E-01   |
| Beijing | rs35597309 | chr6  | 32589266  | nonsmoker        | i         | 0.943 | 877         | 679      | G                | A             | 0.072         | 0.090         | 0.97 | (0.71-1.31) | 8.27E-01 |            |
| Beijing | rs35597309 | chr6  | 32589266  | smoker           | i         | 0.926 | 1125        | 1278     | G                | A             | 0.066         | 0.074         | 1.06 | (0.79-1.43) | 6.78E-01 |            |
| Beijing | rs35597309 | chr6  | 32589266  | nonsmoker+smoker |           |       | 2002        | 1957     |                  |               |               |               | 1.02 | (0.82-1.25) | 8.84E-01 | 6.56E-01   |
| Henan   | rs35597309 | chr6  | 32589266  | nonsmoker        | i         | 0.923 | 136         | 809      | G                | A             | 0.074         | 0.103         | 1.39 | (0.88-2.20) | 1.61E-01 |            |
| Henan   | rs35597309 | chr6  | 32589266  | smoker           | i         | 0.932 | 33          | 288      | G                | A             | 0.075         | 0.088         | 1.13 | (0.42-3.02) | 8.11E-01 |            |
| Henan   | rs35597309 | chr6  | 32589266  | nonsmoker+smoker |           |       | 169         | 1097     |                  |               |               |               | 1.34 | (0.88-2.03) | 1.71E-01 | 7.08E-01   |
| NCI     | rs35597309 | chr6  | 32589266  | nonsmoker        | i         | 0.909 | 881         | 922      | G                | A             | 0.073         | 0.123         | 1.91 | (1.51-2.40) | 5.84E-08 |            |
| NCI     | rs35597309 | chr6  | 32589266  | smoker           | i         | 0.908 | 1222        | 1003     | G                | A             | 0.090         | 0.101         | 1.15 | (0.93-1.43) | 1.86E-01 |            |
| NCI     | rs35597309 | chr6  | 32589266  | nonsmoker+smoker |           |       | 2103        | 1925     |                  |               |               |               | 1.45 | (1.24-1.69) | 3.64E-06 | 1.81E-03   |
| Beijing | rs61271866 | chr9  | 21997015  | nonsmoker        | i         | 0.971 | 877         | 679      | T                | A             | 0.192         | 0.239         | 1.24 | (1.01-1.52) | 3.90E-02 |            |
| Beijing | rs61271866 | chr9  | 21997015  | smoker           | i         | 0.970 | 1125        | 1277     | T                | A             | 0.192         | 0.217         | 1.15 | (0.97-1.38) | 1.12E-01 |            |
| Beijing | rs61271866 | chr9  | 21997015  | nonsmoker+smoker |           |       | 2002        | 1956     |                  |               |               |               | 1.19 | (1.04-1.36) | 1.07E-02 | 6.01E-01   |
| Henan   | rs61271866 | chr9  | 21997015  | nonsmoker        | i         | 0.990 | 135         | 809      | T                | A             | 0.210         | 0.216         | 1.05 | (0.76-1.45) | 7.55E-01 |            |
| Henan   | rs61271866 | chr9  | 21997015  | smoker           | i         | 0.994 | 32          | 288      | T                | A             | 0.284         | 0.213         | 0.65 | (0.35-1.22) | 1.82E-01 |            |
| Henan   | rs61271866 | chr9  | 21997015  | nonsmoker+smoker |           |       | 167         | 1097     |                  |               |               |               | 0.95 | (0.72-1.27) | 7.47E-01 | 1.83E-01   |
| NCI     | rs61271866 | chr9  | 21997015  | nonsmoker        | i         | 0.990 | 881         | 922      | T                | A             | 0.191         | 0.229         | 1.29 | (1.10-1.52) | 2.04E-03 |            |
| NCI     | rs61271866 | chr9  | 21997015  | smoker           | i         | 0.987 | 1222        | 1003     | T                | A             | 0.185         | 0.235         | 1.36 | (1.17-1.57) | 4.26E-05 |            |
| NCI     | rs61271866 | chr9  | 21997015  | nonsmoker+smoker |           |       | 2103        | 1925     |                  |               |               |               | 1.33 | (1.19-1.48) | 3.28E-07 | 6.62E-01   |

\* 'g' indicates that the SNP was genotyped on the array and 'i' indicates that the SNP was imputed

Supplementary Table 7. Summary of genomic annotation by HaploReg v2 and RegulomeDB

| chr | pos(hg19) | LD    | variant     | Ref | Alt   | Alternative allele frequency |      |      |      | Conservation | Histone marks | DNase               | Proteins bound          | eQTL tissues        | Motifs changed       | GENCODE genes        | RefSeq genes       | dbSNP func annot | RegulomeDB score <sup>†</sup> |
|-----|-----------|-------|-------------|-----|-------|------------------------------|------|------|------|--------------|---------------|---------------------|-------------------------|---------------------|----------------------|----------------------|--------------------|------------------|-------------------------------|
|     |           |       |             |     |       | AFR                          | AMR  | ASN  | EUR  |              |               |                     |                         |                     |                      |                      |                    |                  |                               |
| 6   | 32589266  | hit   | rs35597309  | G   | A     | 0.08                         | 0.03 | 0.08 | 0.05 |              |               | GM12878             | 4 bound proteins        |                     | 6.7kb 5' of HLA-DQA1 | 16kb 5' of HLA-DQA1  |                    | 5                |                               |
| 6   | 32588201  | 1     | rs35945734  | A   | G     | 0.1                          | 0.04 | 0.07 | 0.06 |              |               |                     |                         | Pou2f2              | 7.8kb 5' of HLA-DQA1 | 17kb 5' of HLA-DQA1  |                    | 7                |                               |
| 6   | 32587820  | 1     | rs71542418  | G   | A,C   | 0.1                          | 0.04 | 0.08 | 0.06 |              |               |                     |                         |                     | 8.1kb 5' of HLA-DQA1 | 17kb 5' of HLA-DQA1  |                    | 6                |                               |
| 6   | 32589700  | 1     | rs77875016  | C   | T     | 0.08                         | 0.03 | 0.07 | 0.05 |              |               | GM12878             |                         | MAZR,p300           | 6.3kb 5' of HLA-DQA1 | 15kb 5' of HLA-DQA1  |                    | 7                |                               |
| 6   | 32588432  | 1     | rs34697429  | A   | T     | 0.1                          | 0.04 | 0.07 | 0.06 |              |               |                     |                         | Arid3a,Foxp1        | 7.5kb 5' of HLA-DQA1 | 17kb 5' of HLA-DQA1  |                    | 6                |                               |
| 6   | 32590315  | 1     | rs71542421  | C   | T     | 0.09                         | 0.03 | 0.07 | 0.05 |              |               | GM12878, HMEC       | 12 cell types           |                     | 5.6kb 5' of HLA-DQA1 | 15kb 5' of HLA-DQA1  |                    | 4                |                               |
| 6   | 32588939  | 1     | rs28699237  | A   | T     | 0.08                         | 0.03 | 0.08 | 0.05 |              |               | GM12878             |                         | ERalpha-a           | 7kb 5' of HLA-DQA1   | 16kb 5' of HLA-DQA1  |                    | 7                |                               |
| 6   | 32588272  | 1     | rs28644259  | C   | G     | 0.09                         | 0.03 | 0.08 | 0.05 |              |               |                     |                         | NF-AT               | 7.7kb 5' of HLA-DQA1 | 17kb 5' of HLA-DQA1  |                    | 7                |                               |
| 6   | 32588460  | 1     | rs28592295  | G   | A     | 0.11                         | 0.04 | 0.08 | 0.06 |              |               |                     |                         | AP-1,Irf            | 7.5kb 5' of HLA-DQA1 | 17kb 5' of HLA-DQA1  |                    | 7                |                               |
| 6   | 32611647  | 1     | rs28566533  | G   | C     | 0.09                         | 0.03 | 0.07 | 0.05 |              |               |                     |                         | PU.1,Pbx3,SP2       | HLA-DQA1             | 217bp 3' of HLA-DQA1 |                    | 5                |                               |
| 6   | 32587384  | 1     | rs28411161  | C   | G     | 0.08                         | 0.03 | 0.08 | 0.05 |              |               |                     |                         | HES1                | 8.6kb 5' of HLA-DQA1 | 18kb 5' of HLA-DQA1  |                    | 7                |                               |
| 6   | 32587390  | 1     | rs28391139  | T   | C     | 0.08                         | 0.03 | 0.08 | 0.05 |              |               |                     |                         | HES1                | 8.6kb 5' of HLA-DQA1 | 18kb 5' of HLA-DQA1  |                    | 7                |                               |
| 6   | 32605309  | 1     | rs12722042  | A   | C,G,T | 0.08                         | 0.03 | 0.07 | 0.05 |              |               | GM12878             | FibroP                  |                     | HLA-DQA1             | HLA-DQA1             | missense           | 4                |                               |
| 6   | 32605284  | 1     | rs12722039  | G   | A     | 0.08                         | 0.03 | 0.07 | 0.05 |              |               | GM12878             | FibroP                  |                     | HLA-DQA1             | HLA-DQA1             | missense           | 4                |                               |
| 6   | 32591151  | 1     | rs35765065  | C   | T     | 0.08                         | 0.03 | 0.07 | 0.05 |              |               |                     |                         | NRSF                | HLA-DQA1             | HLA-DQA1             |                    | 4                |                               |
| 6   | 32581157  | 1     | rs75765164  | G   | A     | 0.08                         | 0.03 | 0.07 | 0.05 |              |               | NHEK, GM12878, HMEC | GM19238,Urothelia       | RFX5,TBP            | 4.8kb 5' of HLA-DQA1 | 14kb 5' of HLA-DQA1  |                    | 3a               |                               |
| 6   | 32600468  | 1     | rs116499104 | G   | A     | 0.08                         | 0.03 | 0.06 | 0.04 |              |               |                     |                         | 8 altered motifs    | 15kb 5' of HLA-DQA1  | 24kb 5' of HLA-DRB1  |                    | 7                |                               |
| 6   | 32585681  | 1     | rs13217507  | A   | T     | 0.08                         | 0.03 | 0.08 | 0.05 |              |               |                     |                         | STAT,TCF4           | HLA-DQA1             | 4.7kb 5' of HLA-DQA1 |                    | 7                |                               |
| 6   | 32588216  | 1     | rs71542420  | A   | G     | 0.08                         | 0.03 | 0.07 | 0.05 |              |               |                     |                         | AP-1,PRDM1,PU.1     | 10kb 5' of HLA-DQA1  | 20kb 5' of HLA-DQA1  |                    | 6                |                               |
| 6   | 32574108  | 1     | rs34107399  | G   | A     | 0.08                         | 0.03 | 0.07 | 0.05 |              |               |                     |                         | 5 altered motifs    | 10kb 5' of HLA-DQA1  | 20kb 5' of HLA-DQA1  |                    | 5                |                               |
| 6   | 32572742  | 1     | rs115673262 | C   | G     | 0.08                         | 0.03 | 0.07 | 0.05 |              |               |                     |                         | 4 altered motifs    | 7.7kb 5' of HLA-DQA1 | 17kb 5' of HLA-DQA1  |                    | 6                |                               |
| 6   | 32585052  | 1     | rs13213778  | C   | A     | 0.09                         | 0.03 | 0.07 | 0.05 |              |               | GM12878             |                         | LXR,Znf143          | 16kb 5' of HLA-DRB1  | 17kb 5' of HLA-DRB1  | intronic           | 7                |                               |
| 6   | 32589495  | 1     | rs35990832  | G   | A     | 0.08                         | 0.04 | 0.07 | 0.05 |              |               | GM12878             |                         | TAL1                | 15kb 5' of HLA-DRB1  | 15kb 5' of HLA-DRB1  | intronic           | 7                |                               |
| 6   | 32589101  | 1     | rs34846487  | T   | G     | 0.08                         | 0.03 | 0.07 | 0.05 |              |               | GM12878             | CD20+                   | 4 altered motifs    | 11kb 5' of HLA-DQA1  | 20kb 5' of HLA-DQA1  |                    | 6                |                               |
| 6   | 32589095  | 1     | rs28669773  | A   | G     | 0.1                          | 0.04 | 0.07 | 0.06 |              |               | GM12878             |                         | Foxm1,Pou2f2        | 6.5kb 5' of HLA-DQA1 | 16kb 5' of HLA-DQA1  |                    | 5                |                               |
| 6   | 32586157  | 1     | rs70993900  | AC  | A     | 0.09                         | 0.03 | 0.07 | 0.05 |              |               | GM12878             |                         | Sox,TAL1            | 6.9kb 5' of HLA-DQA1 | 16kb 5' of HLA-DQA1  |                    | 6                |                               |
| 6   | 32588080  | 1     | rs35372933  | T   | C     | 0.09                         | 0.03 | 0.07 | 0.05 |              |               |                     |                         | SIX5,Sox            | 6.9kb 5' of HLA-DQA1 | 16kb 5' of HLA-DQA1  |                    | 6                |                               |
| 6   | 32599904  | 1     | rs34680078  | G   | A     | 0.08                         | 0.03 | 0.07 | 0.05 |              |               |                     |                         | 4 altered motifs    | 9.8kb 5' of HLA-DQA1 | 19kb 5' of HLA-DQA1  |                    | 6                |                               |
| 6   | 32586961  | 1     | rs114812135 | A   | T     | 0.08                         | 0.03 | 0.07 | 0.05 |              |               |                     |                         | LBP-1,Nanog,TEF-1   | 7.9kb 5' of HLA-DQA1 | 17kb 5' of HLA-DQA1  |                    | 7                |                               |
| 6   | 32597341  | 1     | rs114798579 | G   | A     | 0.08                         | 0.03 | 0.07 | 0.05 |              |               |                     |                         | Ets,Foxp3           | HLA-DQA1             | 5.3kb 5' of HLA-DQA1 |                    | 7                |                               |
| 6   | 32585696  | 1     | rs13217512  | A   | C     | 0.08                         | 0.03 | 0.08 | 0.05 |              |               |                     |                         | 4 altered motifs    | 9kb 5' of HLA-DQA1   | 18kb 5' of HLA-DQA1  |                    | 7                |                               |
| 6   | 32589372  | 1     | rs28664035  | T   | A     | 0.1                          | 0.05 | 0.08 | 0.06 |              |               |                     |                         | SETDB1              | HLA-DQA1             | 7.8kb 5' of HLA-DQA1 |                    | 7                |                               |
| 6   | 32591360  | 1     | rs114480004 | G   | C     | 0.08                         | 0.03 | 0.07 | 0.05 |              |               | GM12878             |                         | 5 bound proteins    | 10kb 5' of HLA-DQA1  | 19kb 5' of HLA-DQA1  |                    | 5                |                               |
| 6   | 32590529  | 1     | rs35407883  | A   | G     | 0.08                         | 0.03 | 0.07 | 0.05 |              |               | NHEK, GM12878, HMEC |                         | 7 altered motifs    | 6.6kb 5' of HLA-DQA1 | 16kb 5' of HLA-DQA1  |                    | 5                |                               |
| 6   | 32584237  | 1     | rs6930731   | C   | T     | 0.08                         | 0.03 | 0.07 | 0.05 |              |               | GM12878, HMEC, NHEK | 14 cell types           | GATA,HNF1,Nkx3      | 4.6kb 5' of HLA-DQA1 | 14kb 5' of HLA-DQA1  |                    | 7                |                               |
| 6   | 32607513  | 0.932 | rs71542422  | C   | T     | 0.09                         | 0.03 | 0.09 | 0.06 |              |               | GM12878             |                         | Pou5f1,TBX5         | 5.4kb 5' of HLA-DQA1 | 15kb 5' of HLA-DQA1  |                    | 4                |                               |
| 6   | 32615346  | 0.932 | rs28609302  | C   | G     | 0.09                         | 0.04 | 0.08 | 0.05 |              |               |                     |                         | Pax-5,RREB-1,Znf143 | 12kb 5' of HLA-DQA1  | 21kb 5' of HLA-DQA1  |                    | 7                |                               |
| 6   | 32585128  | 0.932 | rs67265013  | T   | TC    | 0.09                         | 0.04 | 0.08 | 0.06 |              |               | GM12878             |                         | ATF3,E2F,XBP-1      | HLA-DQA1             | HLA-DQA1             | intronic           | 5                |                               |
| 6   | 32573025  | 0.928 | rs144453041 | A   | G     | 0.07                         | 0.03 | 0.07 | 0.05 |              |               | GM12878             |                         | 5 altered motifs    | 506bp 3' of HLA-DQA1 | 3.9kb 3' of HLA-DQA1 |                    | 6                |                               |
| 6   | 32604588  | 0.928 | rs28619112  | C   | G     | 0.09                         | 0.03 | 0.07 | 0.05 |              |               | GM12878             | H9ES,Myometr,RPTEC      | 13 altered motifs   | 11kb 5' of HLA-DQA1  | 20kb 5' of HLA-DQA1  |                    | 6                |                               |
| 6   | 32586432  | 0.928 | rs13191494  | G   | C     | 0.09                         | 0.03 | 0.07 | 0.05 |              |               |                     |                         | 8 altered motifs    | 15kb 5' of HLA-DRB1  | 15kb 5' of HLA-DRB1  | intronic           | 6                |                               |
| 6   | 32586465  | 0.928 | rs34598287  | A   | T     | 0.08                         | 0.03 | 0.07 | 0.05 |              |               |                     |                         | 7 altered motifs    | HLA-DQA1             | 593bp 5' of HLA-DQA1 |                    | 3a               |                               |
| 6   | 32575610  | 0.928 | rs34356392  | T   | G     | 0.08                         | 0.03 | 0.07 | 0.04 |              |               | GM12878             | 5 cell types            | Ets,Znf143,p300     | 9.5kb 5' of HLA-DQA1 | 19kb 5' of HLA-DQA1  |                    | 7                |                               |
| 6   | 32618187  | 0.872 | rs138279058 | T   | C     | 0.11                         | 0.05 | 0.1  | 0.08 |              |               |                     |                         | Maf,STAT            | 9.5kb 5' of HLA-DQA1 | 19kb 5' of HLA-DQA1  |                    | 7                |                               |
| 6   | 32588449  | 0.872 | rs28456694  | G   | T     | 0.1                          | 0.04 | 0.08 | 0.06 |              |               |                     |                         | Pou2f2              | 18kb 5' of HLA-DRB1  | 18kb 5' of HLA-DRB1  |                    | 4                |                               |
| 6   | 32619285  | 0.86  | rs28418633  | C   | T     | 0.11                         | 0.06 | 0.09 | 0.08 |              |               |                     |                         | 6 altered motifs    | 3.3kb 3' of HLA-DQA1 | 6.8kb 3' of HLA-DQA1 |                    | 6                |                               |
| 6   | 32601204  | 0.856 | rs114549185 | C   | G     | 0.07                         | 0.03 | 0.06 | 0.05 |              |               |                     |                         | 5 altered motifs    | 7.5kb 5' of HLA-DQA1 | 17kb 5' of HLA-DQA1  |                    | 7                |                               |
| 6   | 32596247  | 0.856 | rs117418599 | G   | T     | 0.07                         | 0.03 | 0.07 | 0.05 |              |               | GM12878             |                         | 5 altered motifs    | 4.4kb 3' of HLA-DQA1 | 7.9kb 3' of HLA-DQA1 |                    | 7                |                               |
| 6   | 32614938  | 0.818 | rs28546328  | G   | A     | 0.09                         | 0.05 | 0.09 | 0.06 |              |               | GM12878             | GM06990                 | 5 altered motifs    | HLA-DQA1             | 4kb 5' of HLA-DQA1   |                    | 6                |                               |
| 6   | 32587835  | 0.818 | rs71542419  | C   | A     | 0.14                         | 0.08 | 0.08 | 0.11 |              |               |                     |                         | 8 altered motifs    | HLA-DQA1             | 8.9kb 5' of HLA-DQA1 |                    | 5                |                               |
| 5   | 138861146 | hit   | rs7447927   | C   | G     | 0.11                         | 0.52 | 0.38 | 0.69 |              |               | H5MM                | 6 cell types            | TCF12               | TMEM173              | TMEM173              | synonymous         | 5                |                               |
| 5   | 138852369 | 0.978 | rs13153461  | G   | A     | 0.09                         | 0.59 | 0.38 | 0.69 |              |               |                     | Huvec, H1               | 4 altered motifs    | 2.7kb 3' of TMEM173  | 2.7kb 3' of TMEM173  |                    | 1f               |                               |
| 5   | 138862744 | 0.978 | rs13166214  | A   | G     | 0.14                         | 0.52 | 0.38 | 0.68 |              |               |                     | 8 cell types            | BATF,Irf            | 223bp 5' of TMEM173  | 400bp 5' of TMEM173  |                    | 7                |                               |
| 5   | 138850905 | 0.956 | rs13181561  | G   | A     | 0.39                         | 0.61 | 0.38 | 0.69 |              |               |                     | H1                      | CEBPB               | 4.2kb 3' of TMEM173  | 4.2kb 3' of TMEM173  |                    | 1f               |                               |
| 5   | 138842818 | 0.934 | rs9716069   | T   | A     | 0.34                         | 0.61 | 0.39 | 0.68 |              |               |                     | Huvec                   | Hoxd10              | 489bp 5' of ECSCR    | 497bp 5' of ECSCR    |                    | 7                |                               |
| 17  | 7557834   | hit   | rs1642764   | C   | T     | 0.25                         | 0.48 | 0.55 | 0.52 |              |               |                     | Th1,Hepatocytes,Osteobl | 5 altered motifs    | ATP1B2               | ATP1B2               | intronic           | 5                |                               |
| 17  | 7557419   | 0.734 | rs1642763   | A   | G     | 0.92                         | 0.8  | 0.63 | 0.78 |              |               |                     | Adult_CD4_Th0           | AP-2,EBF,NRSF       | ATP1B2               | ATP1B2               |                    | 1f               |                               |
| 17  | 7559462   | 0.662 | rs1641512   | G   | A,C,T | 0.68                         | 0.78 | 0.61 | 0.77 |              |               |                     | H1                      |                     | ATP1B2               | ATP1B2               | 3'-UTR             | 7                |                               |
| 17  | 7559677   | 0.662 | rs1641511   | G   | A     | 0.58                         | 0.77 | 0.61 | 0.77 |              |               |                     | H1                      |                     | ATP1B2               | ATP1B2               |                    | 7                |                               |
| 17  | 7560835   | 0.575 | rs1050541   | T   | G     | 0.59                         | 0.4  | 0.36 | 0.51 |              |               |                     | 8 cell types            | 12 altered motifs   | ATP1B2               | ATP1B2               | 3'-UTR             | 1b               |                               |
| 17  | 7554772   | 0.567 | rs1642762   | C   | T     | 0.07                         | 0.6  | 0.44 | 0.56 |              |               | H1                  | 6 cell types            | 9 altered motifs    | ATP1B2               | ATP1B2               | 5'-UTR             | 5                |                               |
| 17  | 7549681   | 0.567 | rs1641523   | C   | T     | 0.25                         | 0.58 | 0.44 | 0.58 |              |               |                     | K562                    |                     | 263bp 5' of ATP1B2   | 4.6kb 5' of ATP1B2   |                    | 1f               |                               |
| 17  | 7553743   | 0.567 | rs1624085   | G   | C     | 0.16                         | 0.6  | 0.44 | 0.57 |              |               |                     | 7 cell types            | 6 altered motifs    | ATP1B2               | 509bp 5' of ATP1B2   |                    | 2b               |                               |
| 17  | 7563354   | 0.542 | rs2908807   | T   | C     | 0.18                         | 0.5  | 0.61 | 0.26 |              |               |                     |                         | 9 altered motifs    | ATP1B2               | 1.7kb 3' of TP53     | 2.3kb 3' of ATP1B2 |                  | 6                             |
| 17  | 7455707   | 0.521 | rs78608249  | C   | T     | 0.18                         | 0.26 | 0.41 | 0.28 |              |               | GM12878             |                         | 6 altered motifs    | ATP1B2               | 509bp 5' of ATP1B2   |                    | 2b               |                               |
| 17  |           |       |             |     |       |                              |      |      |      |              |               |                     |                         |                     |                      |                      |                    |                  |                               |

Supplementary Table 8. Independent and joint analysis of 12 previously reported loci associated with risk of ESCC

| Loci     | Gene               | rsID       | Ref_Allele | Effect_Allele | NCI           |               |          |      |             | Henan         |               |          |      |             | Beijing       |               |          |      |             | Combined      |               |          |      |             |
|----------|--------------------|------------|------------|---------------|---------------|---------------|----------|------|-------------|---------------|---------------|----------|------|-------------|---------------|---------------|----------|------|-------------|---------------|---------------|----------|------|-------------|
|          |                    |            |            |               | Effect_Allele | Effect_Allele | P_value  | OR   | 95% CI      | Effect_Allele | Effect_Allele | P_value  | OR   | 95% CI      | Effect_Allele | Effect_Allele | P_value  | OR   | 95% CI      | Effect_Allele | Effect_Allele | P_value  | OR   | 95% CI      |
|          |                    |            |            |               | Freq_Control  | Freq_Case     |          |      |             | Freq_Control  | Freq_Case     |          |      |             | Freq_Control  | Freq_Case     |          |      |             | Freq_Control  | Freq_Case     |          |      |             |
| 10q23.33 | PLCE1,KIAA1516     | rs2274223  | A          | G             | 0.210         | 0.260         | 3.47E-09 | 1.36 | (1.23-1.50) | 0.213         | 0.271         | 1.80E-05 | 1.38 | (1.19-1.59) | 0.207         | 0.263         | 1.12E-05 | 1.32 | (1.17-1.50) | 0.209         | 0.264         | 3.65E-18 | 1.35 | (1.26-1.45) |
| 2q33.1   | CASP8,ALS2CR12     | rs13016963 | A          | G             | 0.728         | 0.687         | 1.16E-06 | 0.79 | (0.72-0.87) | 0.739         | 0.686         | 6.94E-05 | 0.75 | (0.65-0.87) | 0.690         | 0.659         | 4.47E-04 | 0.82 | (0.73-0.91) | 0.717         | 0.676         | 4.29E-13 | 0.79 | (0.75-0.84) |
| 21q22.12 | RUNX1              | rs2014300  | A          | G             | 0.865         | 0.866         | 7.64E-01 | 1.02 | (0.90-1.16) | 0.854         | 0.872         | 2.88E-02 | 1.23 | (1.02-1.49) | 0.808         | 0.876         | 8.42E-13 | 1.68 | (1.46-1.94) | 0.843         | 0.871         | 7.91E-09 | 1.28 | (1.18-1.39) |
| 22q12.1  | CHEK2,CCDC117,XBP1 | rs2239815  | T          | C             | 0.609         | 0.562         | 2.19E-05 | 0.83 | (0.76-0.91) | 0.599         | 0.573         | 1.06E-01 | 0.90 | (0.79-1.02) | 0.627         | 0.568         | 2.39E-02 | 0.88 | (0.79-0.98) | 0.613         | 0.567         | 4.09E-07 | 0.86 | (0.81-0.91) |
| 5q11.2   | PDE4D,PDE4DN2      | rs10052657 | C          | A             | 0.149         | 0.148         | 4.12E-01 | 0.95 | (0.85-1.07) | 0.161         | 0.150         | 1.69E-01 | 0.88 | (0.74-1.05) | 0.060         | 0.019         | 1.32E-16 | 0.34 | (0.26-0.44) | 0.120         | 0.101         | 1.15E-06 | 0.80 | (0.73-0.87) |
| 16q12.1  | HEATR3             | rs4785204  | C          | T             | 0.274         | 0.285         | 3.99E-01 | 1.04 | (0.95-1.15) | 0.263         | 0.300         | 4.60E-04 | 1.29 | (1.12-1.48) | 0.253         | 0.307         | 9.06E-05 | 1.26 | (1.12-1.42) | 0.265         | 0.297         | 1.83E-05 | 1.15 | (1.08-1.23) |
| 3q27.3   | ST6GAL1            | rs2239612  | G          | A             | 0.188         | 0.206         | 5.19E-02 | 1.11 | (1.00-1.23) | 0.189         | 0.198         | 9.32E-01 | 1.01 | (0.86-1.18) | 0.168         | 0.212         | 5.17E-03 | 1.21 | (1.06-1.39) | 0.182         | 0.206         | 2.82E-03 | 1.12 | (1.04-1.20) |
| 6p21.1   |                    | rs10484761 | T          | C             | 0.112         | 0.101         | 9.04E-02 | 0.89 | (0.77-1.02) | 0.104         | 0.098         | 9.70E-01 | 1.00 | (0.81-1.24) | 0.058         | 0.111         | 2.39E-12 | 1.84 | (1.55-2.18) | 0.092         | 0.104         | 4.62E-03 | 1.14 | (1.04-1.26) |
| 17q21.2  | JUP,HAP1           | rs6503659  | A          | T             | 0.853         | 0.850         | 7.29E-01 | 1.02 | (0.90-1.15) | 0.843         | 0.839         | 8.76E-01 | 1.01 | (0.85-1.21) | 0.881         | 0.842         | 8.49E-03 | 0.81 | (0.70-0.95) | 0.861         | 0.844         | 1.67E-01 | 0.94 | (0.87-1.02) |
| 17p13.3  | SMG6               | rs17761864 | C          | A             | 0.175         | 0.182         | 5.05E-01 | 0.96 | (0.86-1.08) | 0.174         | 0.193         | 2.03E-01 | 1.11 | (0.94-1.31) | 0.137         | 0.179         | 1.12E-01 | 1.12 | (0.97-1.29) | 0.162         | 0.183         | 2.71E-01 | 1.04 | (0.97-1.12) |
| 20p13    | C20orf54           | rs13042395 | C          | T             | 0.302         | 0.255         | 3.04E-01 | 0.95 | (0.86-1.05) | 0.287         | 0.249         | 9.12E-02 | 0.88 | (0.76-1.02) | 0.375         | 0.339         | 3.34E-01 | 1.07 | (0.93-1.23) | 0.324         | 0.284         | 3.02E-01 | 0.96 | (0.90-1.03) |
| 18p11.21 | PTPN2              | rs2847281  | A          | G             | 0.191         | 0.192         | 2.86E-01 | 0.94 | (0.85-1.05) | 0.189         | 0.204         | 2.72E-01 | 1.10 | (0.93-1.29) | 0.156         | 0.196         | 2.47E-01 | 1.08 | (0.95-1.24) | 0.178         | 0.196         | 5.75E-01 | 1.02 | (0.95-1.10) |



**Supplementary Table 9.** Associations in individual GWAS for top 4 SNPs before and after PC adjustment

| SNP               | Beijing              |          |                     |          |
|-------------------|----------------------|----------|---------------------|----------|
|                   | Before PC Adjustment |          | After PC Adjustment |          |
|                   | OR (95% CI)          | P        | OR (95% CI)         | P        |
| <b>rs7447927</b>  | 1.11 (1.01-1.22)     | 2.72E-02 | 0.90 (0.81-1.01)    | 5.60E-02 |
| <b>rs1642764</b>  | 0.80 (0.73-0.89)     | 2.50E-05 | 0.88 (0.78-0.99)    | 3.12E-02 |
| <b>rs35597309</b> | 1.14 (0.96-1.37)     | 1.38E-01 | 1.02 (0.82-1.25)    | 8.83E-01 |
| <b>rs61271866</b> | 1.23 (1.10-1.38)     | 2.57E-04 | 1.17 (1.03-1.34)    | 1.82E-02 |

  

|                   | NCI                  |          |                     |          |
|-------------------|----------------------|----------|---------------------|----------|
|                   | Before PC Adjustment |          | After PC Adjustment |          |
|                   | OR (95% CI)          | P        | OR (95% CI)         | P        |
| <b>rs7447927</b>  | 0.90 (0.83-0.98)     | 1.78E-02 | 0.90 (0.83-0.98)    | 1.60E-02 |
| <b>rs1642764</b>  | 0.84 (0.77-0.92)     | 1.28E-04 | 0.84 (0.77-0.92)    | 1.21E-04 |
| <b>rs35597309</b> | 1.44(1.23-1.67)      | 3.76E-06 | 1.43 (1.23-1.67)    | 4.27E-06 |
| <b>rs61271866</b> | 1.34 (1.20-1.49)     | 6.84E-08 | 1.34 (1.20-1.48)    | 7.72E-08 |

  

|                   | Henan                |          |                      |   |
|-------------------|----------------------|----------|----------------------|---|
|                   | Before PC Adjustment |          | After PC Adjustment* |   |
|                   | OR (95% CI)          | P        | OR (95% CI)          | P |
| <b>rs7447927</b>  | 0.77 (0.68-0.88)     | 7.64E-05 |                      |   |
| <b>rs1642764</b>  | 0.84 (0.74-0.96)     | 1.19E-02 |                      |   |
| <b>rs35597309</b> | 1.55 (1.22-1.97)     | 3.50E-04 |                      |   |
| <b>rs61271866</b> | 1.03 (0.88-1.21)     | 6.82E-01 |                      |   |

\*Baseline risk model indicated no need for PC adjustment (lambda value before PC adjustment 1.02)
